# Supplementary material for: Genetically Programmed Differences in Epidermal Host Defense between Psoriasis and Atopic Dermatitis Patients
Source: PubMed Central journal article supplement (PMC2409155; doi:10.1371/journal.pone.0002301), 2008-06-04
Supplement: pone.0002301.s001.pdf [file pone.0002301.s001.pdf]

**Table S1. Primers used for quantitative real-time PCR**

| HUGO Gene Symbol | ENSEMBLE Transcript no. | Description Gene/Protein               | Forward primer              | Reverse primer                | E*   |
|------------------|-------------------------|----------------------------------------|-----------------------------|-------------------------------|------|
| AREG             | ENST00000264487         | amphiregulin                           | tggaagcagtaacatgcaaatgctc   | ggctgctaagcaatttggataa        | 1.94 |
| ARG1             | ENST00000237310         | arginase 1                             | acagtttggcaattggaagca       | caccagatgactccaagatcag        | 2.13 |
| CA2              | ENST00000285379         | carbonic anhydrase II                  | aacaatggatgcttcaacg         | tgccatcaagtgaaacccag          | 2.00 |
| CALML5           | ENST00000315247         | calmodulin-like 5, CLSP                | ggtgacacggatggaacg          | aacctggagatgagttccttag        | 2.06 |
| CAMP             | ENST00000296435         | cathelicidin, LL37                     | ccaggcccacgatggat           | accgcccctcctctga              | 1.83 |
| CCL20            | ENST00000358813         | SCYA20, MIP3- $\alpha$                 | tggccaatgaaggctgga          | gatttgcgacagacaactt           | 1.83 |
| CCL27            | ENST00000259631         | CTACK                                  | ccaggcttctgctctcac          | cttctcctctgggtcctcaaac        | 2.00 |
| CCL5             | ENST00000293272         | RANTES                                 | tctgctcctctgctctg           | gggcaatgagcacaagca            | 1.90 |
| CST6             | ENST00000312134         | cystatin M/E                           | tccgagacacgcacatcatc        | ccatctccatgctcaggaagtac       | 1.96 |
| CTSL             | ENST00000257498         | cathepsin L                            | gttctattgatgacaggtcatga     | actgctacagctggctcaaaataaa     | 1.86 |
| CTSL2            | ENST00000259470         | cathepsin L2/V, CTSV                   | gctatggatgacggcattc         | acacatgatccagggttttgc         | 1.97 |
| CXCL1            | ENST00000296031         | GRO1, SCYB1                            | gcggaagctgctcctcaa          | tcagcatctttctgatgttctt        | 2.00 |
| CXCL10           | ENST00000306602         | SCYB10, IP10                           | ttcctgcaaggccaatttctc       | ttcttcacccctcttctcaattg       | 1.99 |
| CXCL2            | ENST00000264492         | GRO2, SCYB1, MIP2                      | cgccatgggttaagaaaatca       | ccttctggcagtggttgc            | 1.94 |
| DEFB1            | ENST00000297439         | hBD-1, defensin $\beta$ 1              | gatgctctccagggtttttt        | ggatgacataggtccactctt         | 2.00 |
| DEFB103          | ENST00000318124         | hBD-3, defensin $\beta$ 3              | gtgaagcctagcagctatgaggat    | tgattcctcatgacctggaa          | 2.06 |
| DEFB4            | ENST00000318157         | hBD-2, defensin $\beta$ 2              | gatgctctccagggtttttt        | ggatgacataggtccactctt         | 1.97 |
| DKK1             | ENST00000224974         | dickkopf, xenopus homolog              | atcatgacacctggatgggtatt     | cttctgctcttgggtgatacatt       | 2.13 |
| FABP5            | ENST00000297258         | fatty acid binding protein 5           | acctgggagagaagttgaaga       | tgaaagttgcagacagctgagttt      | 2.20 |
| FAS              | ENST00000355740         | TNFRSF6, FAS antigen                   | tcagaagatgtagattgtgatga     | ggctcgggtgacagtttatt          | 2.06 |
| GJA1             | ENST00000282561         | connexin 43                            | caatcacttggcggactca         | acctgtcaaggagttgcctaa         | 1.83 |
| IER3             | ENST00000259874         | immediate early response 3             | tcctgtttgtctccctctacg       | tcaggatctgagcagaagacgat       | 2.13 |
| IL18             | ENST00000280357         | interleukin 18, IL-18                  | atcgctcctctcgcaaaa          | cttctactgttgcagcagcatct       | 1.89 |
| IL1A             | ENST00000263339         | interleukin 1 $\alpha$ , IL-1 $\alpha$ | cgccaatgactcagaggaaga       | agggcgctcctcagatgaa           | 2.20 |
| IL1B             | ENST00000263341         | interleukin 1 $\beta$ , IL-1 $\beta$   | aatctgtacctgctcgtggtt       | tggtgaaatttgggatctacactct     | 2.20 |
| IL1F8            | ENST00000259213         | IL1 family member 8, IL-1F8            | accaccatctgatctctgttctct    | gctgctcctccctgttg             | 1.89 |
| IL1F9            | ENST00000259205         | IL1 family member 9, IL-1F9            | aggaagggcgctctatcaatc       | gaactgccacaaggttctgac         | 2.06 |
| IL1R1            | ENST00000233946         | interleukin 1 receptor, type 1         | cctgctatgatttctcccaataaa    | aacacaaaatatcacagtcagaggtagac | 1.83 |
| IL1RN            | ENST00000354115         | IL-1 receptor antagonist, IL-1RA       | cagctggaggcaggttaaacacac    | ccactgtctgagcggatgaa          | 2.00 |
| IL8              | ENST00000307407         | interleukin 8, IL-8, CXCL8             | cttggcagctctcctgattt        | ttcttagcactcctggcaaaa         | 2.06 |
| IVL              | ENST00000295365         | involucrin                             | actatttccgggtccgctaggt      | gagacatgtagaggacagagtcag      | 1.89 |
| JUNB             | ENST00000302754         | oncogene JUN-B                         | cgcccgatgtgcacla            | cggccgatccccgtagct            | 1.89 |
| KLK13            | ENST00000156476         | kallikrein 13                          | gtgaattaccacaaactctacaatgt  | agacttgacgacactcctcatctg      | 2.06 |
| KLK6             | ENST00000310157         | kallikrein 6                           | gagcggcctgaagaagct          | tcgcccgtcaccacacta            | 2.13 |
| KLK7             | ENST00000304045         | kallikrein 7, SCCE                     | gcatccccagctccaagaa         | cagggtacctctgcacaccaa         | 1.89 |
| KRT10            | ENST00000269576         | keratin 10, CK10                       | tggtcaatgaaaagagcaagga      | gggattgttcaaggccagtt          | 1.91 |
| KRT14            | ENST00000167586         | Keratin 14, CK14                       | ggcctgctgagatcaagactac      | cactgtgctgtagaatctgtt         | 1.91 |
| KRT17            | ENST00000326333         | keratin 17, CK17                       | catgcaggcctggagataga        | cacgcagtagcggctctctgt         | 2.00 |
| KRT6A            | ENST00000252250         | keratin 6A, CK6A                       | agagaatgaattgtgactctgagaag  | tacaaggctctcaggaagttgatct     | 2.08 |
| LCN2             | ENST00000277480         | lipocalin 2, NGAL                      | caatgtcaccctccgtctgtta      | ctggcaacctggaacaaaagtc        | 2.13 |
| LGMN             | ENST00000334869         | legumain, AEP, PRSC1                   | tgagatggaacaaaacaatctc      | gggtgaggtcaaggtgtgtga         | 1.85 |
| MT2A             | ENST00000245185         | methallothionein 2A                    | gccaggcctgcatctg            | tttgtggaagtcgcttcttta         | 2.01 |
| NELL2            | ENST00000333837         | Nel-like2                              | taagggtataatgcaagatgtccaatt | agatctgggcactgagcaataaa       | 2.06 |
| PI3              | ENST00000243924         | SKALP, elafin                          | catgaggccagcagctt           | tttaacaggaactccccgagaca       | 2.00 |
| RPLP0            | ENST00000228306         | ribosomal phosphoprotein P0, hARP      | caccattgaaatcctgagtgatgt    | tgaccagcccaaggagaag           | 2.00 |
| S100A8           | ENST00000271846         | calgranulin A, MRP8                    | ccgagtgctcctcagtatcaggaa    | acgcccatttaccacagaat          | 1.97 |
| S100A9           | ENST00000295382         | calgranulin B, MRP14                   | tggtgctcctcgcttgg           | gcgttccagctgcagat             | 2.20 |
| SLPI             | ENST00000338380         | ALP, HUS1                              | ttcccctgtaagagctgattc       | galatcagtggtggagccaagtc       | 1.95 |
| SPRR2C           | ENST00000290702         | small proline-rich protein 2C          | accctgaagtcctctgag          | gggaaggtgtcaccagaggata        | 2.00 |
| TGFA             | ENST00000295400         | transforming growth factor $\alpha$    | gccattaatggcaatggttagct     | cacaggagctgtcagagat           | 2.13 |
| TGM1             | ENST00000206765         | transglutaminase 1, TGase-1, TGM       | ccccgcagtgagatctaca         | atctcatgttccactgacaca         | 1.89 |
| TLR2             | ENST00000260010         | toll-like receptor 2                   | tccgctcttttgatgagaacaatg    | actccaggtaggtcttgggttca       | 1.89 |
| TLR3             | ENST00000296795         | toll-like receptor 3                   | ttgccaagaggagaatgttaaatct   | cacctatccgtcttctgaactg        | 1.89 |
| TNC              | ENST00000350763         | tenascin C                             | aagtgaacctgtcagggtcatt      | gctgtcaccaggccagatg           | 2.20 |
| TNF              | ENST00000229681         | tumor necrosis factor $\alpha$         | tcttctgcaaccccgagtgga       | cctctgatgacaccaccag           | 2.00 |
| TP73L            | ENST00000354600         | P63 deltaN isoform                     | caatgccagactcaatttagtga     | tgctgtccatgctgtctag           | 1.83 |

\*E is efficiency as fold increase in fluorescence per PCR cycle
