# Supplementary material for: Genetically Programmed Differences in Epidermal Host Defense between Psoriasis and Atopic Dermatitis Patients
Source: PubMed Central journal article supplement (PMC2409155; doi:10.1371/journal.pone.0002301), 2008-06-04
Supplement: pone.0002301.s002.pdf [file pone.0002301.s002.pdf]

**Table S2. qPCR data (Ct values) of 56 genes for 21 cell lines and 3 culture conditions**

Two batches of cDNA were used, as indicated between brackets following each gene name. RPLP0 was used as a reference gene. RPLP0 (1) was used for normalization of batch 1 and RPLP0 (2) was used for normalization of batch 2.

See Table S1 for gene symbols. NS = normal skin, PS = psoriasis, AD = atopic dermatitis

n/a = not analyzed







| DIAG | STIM | S100A8 (f) | S100A9 (f) | SLPI (f) | SPRR2C (2) | TGFA (f) | TGM1 (f) | TLR2 (f) | TLR3 (f) | TNC (2) | TNF (f) | TNFRSF6 (f) | TP73L (f) |
|------|------|------------|------------|----------|------------|----------|----------|----------|----------|---------|---------|-------------|-----------|
| NS1  | KGM  | 23.24      | 22.61      | 17.75    | 21.39      | 27.89    | 26.50    | 31.24    | 32.47    | 32.41   | 34.88   | 30.36       | 23.75     |
| NS1  | TH1  | 19.97      | 19.64      | 17.75    | 19.95      | 28.65    | 25.05    | 32.38    | 33.44    | 32.29   | 33.01   | 31.09       | 24.17     |
| NS1  | TH2  | 24.05      | 22.07      | 19.34    | 21.26      | 26.93    | 26.93    | 31.32    | 29.61    | 28.35   | 33.95   | 27.93       | 22.86     |
| NS2  | KGM  | 23.05      | 21.85      | 20.91    | 23.91      | 27.96    | 27.38    | 32.73    | 31.98    | 32.73   | 34.14   | 29.87       | 23.23     |
| NS2  | TH1  | 17.65      | 18.00      | 17.87    | 20.89      | 27.81    | 25.28    | 29.24    | 31.53    | 31.57   | 28.99   | 29.41       | 23.08     |
| NS2  | TH2  | 24.52      | 25.43      | 20.74    | 23.73      | 31.60    | 30.41    | 31.00    | 32.94    | 27.71   | n/a     | 29.79       | 25.45     |
| NS3  | KGM  | 21.93      | 20.61      | 16.87    | 18.88      | 26.28    | 24.62    | 32.78    | 32.97    | 30.65   | 32.76   | 30.80       | 23.28     |
| NS3  | TH1  | 17.33      | 17.79      | 16.63    | 18.94      | 26.59    | 24.55    | 30.10    | 31.61    | 32.23   | 30.16   | 29.16       | 24.06     |
| NS3  | TH2  | 22.86      | 22.86      | 17.74    | 20.70      | 26.30    | 26.30    | 30.21    | 31.62    | 32.20   | 32.20   | 29.21       | 23.09     |
| NS4  | KGM  | 23.13      | 23.02      | 17.43    | 23.74      | 30.10    | 27.74    | 31.26    | 34.31    | 32.70   | 35.04   | 31.91       | 24.80     |
| NS4  | TH1  | 18.24      | 18.57      | 18.85    | 20.44      | 27.17    | 25.34    | 28.85    | 31.58    | 32.70   | 29.43   | 30.51       | 24.47     |
| NS4  | TH2  | 21.76      | 22.03      | 17.86    | 23.83      | 28.42    | 27.31    | 29.48    | 31.81    | 29.72   | 32.21   | 29.94       | 22.71     |
| NS5  | TH1  | 18.10      | 17.89      | 17.29    | 19.15      | 24.62    | 23.63    | 29.25    | 29.90    | 28.28   | 28.97   | 29.15       | 24.01     |
| NS5  | TH2  | 22.59      | 22.44      | 17.90    | 21.30      | 23.48    | 25.62    | 29.74    | 28.17    | 26.64   | 30.18   | 28.92       | 22.76     |
| NS6  | KGM  | 19.26      | 19.97      | 18.98    | 24.22      | 25.15    | 25.90    | 28.48    | 29.20    | 28.81   | 28.14   | 29.35       | 24.00     |
| NS6  | TH1  | 17.29      | 17.68      | 18.78    | 22.38      | 26.34    | 26.16    | 26.83    | 30.47    | 26.36   | 28.17   | 29.94       | 23.41     |
| NS6  | TH2  | 21.20      | 22.60      | 20.17    | 26.67      | 27.43    | 27.17    | 28.60    | 29.83    | 24.43   | 32.59   | 29.39       | 23.49     |
| NS7  | KGM  | 20.20      | 21.39      | 19.87    | 25.08      | 26.60    | 26.47    | 30.64    | 29.80    | 29.63   | 32.34   | 30.30       | 24.67     |
| NS7  | TH1  | 17.59      | 18.01      | 18.74    | 20.58      | 26.51    | 25.12    | 28.79    | 30.01    | 29.63   | 27.73   | 30.28       | 23.49     |
| NS7  | TH2  | 20.50      | 22.47      | 20.56    | 25.28      | 26.85    | 26.41    | 28.77    | 29.78    | 22.47   | 29.88   | 29.04       | 24.66     |
| PS1  | KGM  | 22.03      | 21.08      | 17.01    | 19.90      | 24.87    | 25.01    | 31.90    | 34.69    | 28.59   | 31.05   | 29.15       | 23.09     |
| PS1  | TH1  | 18.14      | 18.59      | 16.10    | 18.42      | 24.15    | 23.90    | 28.70    | 29.74    | 25.78   | 28.56   | 29.15       | 23.46     |
| PS1  | TH2  | 22.19      | 22.18      | 16.96    | 20.65      | 25.57    | 26.08    | 29.20    | 30.62    | 25.66   | 32.01   | 28.91       | 23.31     |
| PS2  | KGM  | 22.55      | 22.05      | 16.71    | 19.84      | 25.63    | 24.43    | 31.91    | 31.64    | 26.01   | 29.86   | 29.26       | 22.67     |
| PS2  | TH1  | 19.64      | 19.10      | 16.62    | 18.47      | 25.54    | 23.85    | 31.49    | 30.64    | 26.12   | 29.96   | 29.59       | 23.30     |
| PS2  | TH2  | 23.63      | 23.49      | 17.30    | 20.14      | 25.54    | 25.54    | 30.59    | 29.68    | 23.12   | 31.36   | 29.42       | 22.30     |
| PS3  | KGM  | 19.25      | 19.79      | 16.41    | 20.31      | 25.59    | 25.01    | 30.32    | 29.81    | 29.81   | 29.92   | 28.80       | 23.20     |
| PS3  | TH1  | 17.53      | 17.15      | 15.74    | 19.27      | 26.30    | 24.81    | 27.63    | 28.42    | 26.70   | 27.13   | 29.00       | 23.20     |
| PS3  | TH2  | 22.92      | 22.99      | 16.71    | 21.97      | 26.35    | 25.90    | 28.03    | 29.75    | 25.92   | 29.33   | 27.67       | 22.63     |
| PS4  | KGM  | 22.70      | 22.37      | 17.99    | 20.78      | 25.53    | 26.27    | 30.05    | 30.73    | 23.36   | 30.41   | 29.45       | 22.90     |
| PS4  | TH1  | 17.94      | 18.34      | 17.08    | 19.12      | 25.38    | 25.15    | 27.46    | 31.59    | 23.90   | 26.36   | 30.10       | 24.29     |
| PS4  | TH2  | 23.86      | 24.24      | 19.09    | 21.68      | 28.29    | 26.94    | 30.30    | 31.10    | 25.58   | 32.20   | 30.11       | 23.17     |
| PS5  | KGM  | 21.61      | 22.18      | 18.07    | 20.45      | 27.21    | 26.44    | 30.99    | 31.58    | 28.80   | 32.07   | 29.49       | 23.46     |
| PS5  | TH1  | 17.38      | 17.83      | 16.59    | 19.34      | 25.70    | 24.92    | 28.00    | 29.70    | 28.89   | 25.94   | 29.26       | 23.38     |
| PS5  | TH2  | 21.79      | 23.38      | 18.20    | 21.43      | 27.00    | 26.68    | 29.51    | 31.78    | 24.93   | 29.60   | n/a         | 23.58     |
| PS6  | KGM  | 21.80      | 21.62      | 18.64    | 21.01      | 26.09    | 26.85    | 29.02    | 32.70    | 22.30   | 29.75   | 29.74       | 24.23     |
| PS6  | TH1  | 18.61      | 19.18      | 18.47    | 20.63      | 26.51    | 26.41    | 27.14    | 29.79    | 22.06   | 27.74   | 29.34       | 23.37     |
| PS6  | TH2  | 21.27      | 22.41      | 19.52    | 22.17      | 27.60    | 27.31    | 28.25    | 31.88    | 24.18   | 31.32   | 28.99       | 23.25     |
| PS7  | KGM  | 18.97      | 19.83      | 18.17    | 20.83      | 27.14    | 26.25    | 30.22    | 31.15    | 26.02   | 30.11   | 29.22       | 23.32     |
| PS7  | TH1  | 17.59      | 18.01      | 17.27    | 19.58      | 26.95    | 25.72    | 28.66    | 30.86    | 25.92   | 27.31   | 29.73       | 24.63     |
| PS7  | TH2  | 20.37      | 21.67      | 18.96    | 22.52      | 28.32    | 26.64    | 30.30    | 32.25    | 25.57   | 29.62   | 29.71       | 24.25     |
| AD1  | KGM  | 23.12      | 24.43      | 19.05    | 22.96      | 26.88    | 27.46    | 29.14    | 31.91    | 29.03   | 31.33   | 30.15       | 23.40     |
| AD1  | TH1  | 18.24      | 19.62      | 18.23    | 21.82      | 26.73    | 26.84    | 26.88    | 30.50    | 26.09   | 27.35   | 29.31       | 24.01     |
| AD1  | TH2  | 23.70      | 24.35      | 19.30    | 23.58      | 27.40    | 28.09    | 27.07    | 29.77    | 26.11   | 30.92   | 29.27       | 22.82     |
| AD2  | KGM  | 21.84      | 22.82      | 17.66    | 21.16      | 27.77    | 25.68    | 31.84    | 33.43    | 25.36   | 30.37   | 29.31       | 23.00     |
| AD2  | TH1  | 18.05      | 18.84      | 17.77    | 20.37      | 25.64    | 24.67    | 29.16    | 30.22    | 25.64   | 27.20   | 29.08       | 23.58     |
| AD2  | TH2  | 23.29      | 23.89      | 16.60    | 21.48      | 27.49    | 25.90    | 28.06    | 30.87    | 23.54   | 29.75   | 29.67       | 22.92     |
| AD3  | KGM  | 23.13      | 24.07      | 18.78    | 23.03      | 26.35    | 26.33    | 27.74    | 32.22    | 27.88   | 30.44   | 29.19       | 22.95     |
| AD3  | TH1  | 16.82      | 17.80      | 16.81    | 22.32      | 26.81    | 26.35    | 25.93    | 29.59    | 23.21   | 25.98   | 29.48       | 23.57     |
| AD3  | TH2  | 23.34      | 25.22      | 19.27    | 23.50      | 27.88    | 27.15    | 26.98    | 30.65    | 23.59   | 28.83   | 29.90       | 23.50     |
| AD4  | KGM  | 23.20      | 23.18      | 18.22    | 21.69      | 26.48    | 26.85    | 29.88    | 32.61    | 24.54   | 27.78   | 29.51       | 23.85     |
| AD4  | TH1  | 18.88      | 20.44      | 18.10    | 21.40      | 26.75    | 26.79    | 28.16    | 28.85    | 24.67   | 27.35   | 29.42       | 23.99     |
| AD4  | TH2  | 23.28      | 24.85      | 19.53    | 23.01      | 29.42    | 28.20    | 30.68    | 33.11    | 26.14   | 30.69   | 30.07       | 22.86     |
| AD5  | KGM  | 22.90      | 24.59      | 18.71    | 22.13      | 28.97    | 27.90    | 31.87    | 33.15    | 30.02   | 33.03   | 33.58       | 23.92     |
| AD5  | TH1  | 17.31      | 17.97      | 17.42    | 21.07      | 26.45    | 24.80    | 28.60    | 29.10    | 28.56   | 26.81   | 28.60       | 22.95     |
| AD5  | TH2  | 23.98      | 24.84      | 19.05    | 22.51      | 27.04    | 27.72    | 28.43    | 30.67    | 27.30   | 30.50   | 28.96       | 22.66     |
| AD6  | KGM  | 21.13      | 22.70      | 19.18    | 23.02      | 28.08    | 26.98    | 27.93    | 31.53    | 25.64   | 31.09   | 29.53       | 23.30     |
| AD6  | TH1  | 17.96      | 18.45      | 18.78    | 21.91      | 26.90    | 26.98    | 27.10    | 29.62    | 26.28   | 27.10   | 29.53       | 25.26     |
| AD6  | TH2  | 22.38      | 24.76      | 20.28    | 23.46      | 27.68    | 28.19    | 28.02    | 31.29    | 25.65   | 29.79   | 29.21       | 23.37     |
| AD7  | KGM  | 22.40      | 23.66      | 18.84    | 22.44      | 27.73    | 27.03    | 31.64    | 30.20    | 27.59   | 30.64   | 29.74       | 24.52     |
| AD7  | TH1  | 16.84      | 18.29      | 17.68    | 20.27      | 26.68    | 24.86    | 27.78    | 29.50    | 27.78   | 30.19   | 29.08       | 23.59     |
| AD7  | TH2  | 23.82      | 25.06      | 19.60    | 24.16      | 27.73    | 28.10    | 29.19    | 30.63    | 28.03   | 26.94   | 28.82       | 23.50     |
