# Supplementary material for: Genetically Programmed Differences in Epidermal Host Defense between Psoriasis and Atopic Dermatitis Patients
Source: PubMed Central journal article supplement (PMC2409155; doi:10.1371/journal.pone.0002301), 2008-06-04
Supplement: pone.0002301.s003.pdf [file pone.0002301.s003.pdf]

**Table S3. Least square means of  $\Delta$ Ct values of each gene for all diagnoses and stimuli; fold increase of stimuli and diagnoses**

| GENE    | least square means of $\Delta$ Ct |      |      | least square means of $\Delta$ Ct |      |      | fold increase |       |       |         |         |
|---------|-----------------------------------|------|------|-----------------------------------|------|------|---------------|-------|-------|---------|---------|
|         | NS                                | PS   | AD   | KGM                               | Th1  | Th2  | PS/NS         | AD/NS | PS/AD | Th1/KGM | Th2/KGM |
| DEFB103 | 8.9                               | 4.5  | 7.8  | 7.6                               | 5.8  | 7.9  | 21.3          | 2.1   | 9.9   | 3.4     | 0.8     |
| S100A9  | 3.1                               | 2.6  | 5.6  | 4.8                               | 0.4  | 6.2  | 1.4           | 0.2   | 8.1   | 20.4    | 0.4     |
| S100A8  | 2.5                               | 2.4  | 4.9  | 4.5                               | 0.0  | 5.4  | 1.1           | 0.2   | 5.9   | 23.7    | 0.6     |
| DEFB4   | 10.0                              | 6.7  | 11.2 | 12.0                              | 2.8  | 13.1 | 10.1          | 0.5   | 22.1  | 591.3   | 0.5     |
| CST6    | 6.7                               | 4.7  | 5.8  | 6.0                               | 4.6  | 6.6  | 4.0           | 1.8   | 2.2   | 2.7     | 0.7     |
| LCN2    | 6.3                               | 6.6  | 7.4  | 7.4                               | 4.4  | 8.4  | 0.8           | 0.5   | 1.8   | 8.1     | 0.5     |
| IL1F9   | 9.9                               | 10.8 | 12.3 | 12.5                              | 7.8  | 12.7 | 0.5           | 0.2   | 2.7   | 27.1    | 0.9     |
| CXCL10  | 12.6                              | 12.5 | 14.9 | 16.0                              | 8.5  | 15.6 | 1.0           | 0.2   | 5.3   | 187.7   | 1.3     |
| SPRR2C  | 4.7                               | 2.3  | 4.0  | 4.0                               | 2.0  | 5.0  | 5.2           | 1.5   | 3.4   | 4.0     | 0.5     |
| CTSL2   | 3.6                               | 4.6  | 5.5  | 4.4                               | 3.7  | 5.6  | 0.5           | 0.3   | 1.9   | 1.6     | 0.4     |
| CCL20   | 10.2                              | 10.2 | 12.4 | 12.3                              | 8.5  | 12.0 | 1.0           | 0.2   | 4.4   | 13.4    | 1.2     |
| IVL     | 8.0                               | 7.6  | 9.1  | 7.8                               | 7.2  | 9.8  | 1.3           | 0.5   | 2.8   | 1.5     | 0.2     |
| IL1B    | 8.7                               | 10.0 | 13.5 | 10.8                              | 8.3  | 13.2 | 0.4           | 0.0   | 11.4  | 5.7     | 0.2     |
| CXCL2   | 11.7                              | 10.8 | 13.7 | 12.9                              | 9.9  | 13.5 | 1.8           | 0.2   | 7.5   | 7.9     | 0.6     |
| CCL5    | 11.0                              | 9.6  | 11.9 | 12.2                              | 8.8  | 11.6 | 2.6           | 0.5   | 4.9   | 10.6    | 1.5     |
| CA2     | 2.5                               | 1.9  | 1.8  | 2.8                               | 2.8  | 0.6  | 1.5           | 1.5   | 1.0   | 1.0     | 4.6     |
| CALML5  | 7.3                               | 8.6  | 9.1  | 8.6                               | 7.5  | 8.9  | 0.4           | 0.3   | 1.5   | 2.2     | 0.8     |
| LGMN    | 7.6                               | 8.0  | 8.9  | 8.6                               | 7.2  | 8.7  | 0.8           | 0.4   | 1.8   | 2.5     | 0.9     |
| TGM1    | 8.0                               | 8.5  | 9.5  | 9.0                               | 7.3  | 9.8  | 0.7           | 0.4   | 2.0   | 3.2     | 0.6     |
| TLR2    | 11.0                              | 11.7 | 12.9 | 13.1                              | 10.6 | 11.9 | 0.7           | 0.3   | 2.3   | 5.4     | 2.2     |
| SLPI    | 1.1                               | -0.2 | 0.9  | 0.8                               | -0.3 | 1.5  | 2.5           | 1.2   | 2.1   | 2.2     | 0.6     |
| CTSL    | 8.8                               | 8.3  | 9.6  | 9.1                               | 8.3  | 9.1  | 1.4           | 0.6   | 2.4   | 1.8     | 1.0     |
| PI3     | 1.6                               | 0.3  | 3.4  | 2.8                               | -0.6 | 3.0  | 2.5           | 0.3   | 8.9   | 10.2    | 0.9     |
| IL1A    | 6.9                               | 7.8  | 8.4  | 8.1                               | 6.3  | 8.7  | 0.6           | 0.4   | 1.6   | 3.4     | 0.6     |
| IL1RN   | 7.1                               | 7.1  | 8.5  | 7.8                               | 6.5  | 8.5  | 1.0           | 0.4   | 2.7   | 2.5     | 0.6     |
| IL8     | 13.5                              | 9.2  | 16.0 | 14.1                              | 10.3 | 14.4 | 19.2          | 0.2   | 110.2 | 14.2    | 0.8     |
| KLK6    | 9.9                               | 9.9  | 12.1 | 10.9                              | 9.4  | 11.7 | 1.0           | 0.2   | 4.6   | 2.9     | 0.6     |
| NELL2   | 13.6                              | 14.2 | 14.7 | 14.9                              | 14.8 | 12.8 | 0.6           | 0.4   | 1.4   | 1.1     | 4.2     |
| CCL27   | 12.7                              | 10.4 | 11.1 | 12.7                              | 9.3  | 12.1 | 4.9           | 3.1   | 1.6   | 10.7    | 1.5     |
| MT2A    | 4.7                               | 3.0  | 5.9  | 4.8                               | 2.7  | 6.1  | 3.2           | 0.4   | 7.5   | 4.2     | 0.4     |
| IL1F8   | 15.7                              | 14.5 | 15.3 | 15.5                              | 13.5 | 16.4 | 2.2           | 1.3   | 1.7   | 4.1     | 0.5     |
| TNF     | 13.0                              | 12.0 | 12.7 | 13.9                              | 10.2 | 13.5 | 2.1           | 1.2   | 1.7   | 13.0    | 1.3     |
| KLK7    | 6.0                               | 4.8  | 5.1  | 5.0                               | 5.2  | 5.7  | 2.4           | 1.9   | 1.3   | 0.9     | 0.6     |
| FABP5   | 2.6                               | 2.7  | 2.9  | 2.6                               | 2.1  | 3.4  | 0.9           | 0.8   | 1.1   | 1.4     | 0.6     |
| IL18    | 4.7                               | 4.6  | 5.1  | 4.6                               | 4.8  | 5.0  | 1.1           | 0.8   | 1.4   | 0.8     | 0.8     |
| Arg1    | 12.9                              | 13.7 | 13.5 | 13.5                              | 12.3 | 14.3 | 0.6           | 0.7   | 0.9   | 2.3     | 0.6     |
| TGFA    | 8.4                               | 9.5  | 9.9  | 9.4                               | 8.3  | 10.1 | 0.5           | 0.3   | 1.3   | 2.2     | 0.6     |
| TNC     | 8.8                               | 8.4  | 10.8 | 10.4                              | 9.3  | 8.3  | 1.4           | 0.3   | 5.3   | 2.2     | 4.3     |
| KLK13   | 13.0                              | 11.9 | 13.0 | 12.4                              | 12.2 | 13.3 | 2.1           | 1.0   | 2.1   | 1.2     | 0.6     |
| TLR3    | 12.5                              | 14.3 | 13.5 | 14.5                              | 12.3 | 13.5 | 0.3           | 0.5   | 0.6   | 4.5     | 1.9     |
| IERS3   | 11.3                              | 11.4 | 14.1 | 12.8                              | 11.0 | 13.0 | 0.9           | 0.1   | 6.3   | 3.5     | 0.8     |
| AREG    | 5.6                               | 5.1  | 5.9  | 5.5                               | 5.0  | 6.2  | 1.4           | 0.8   | 1.7   | 1.4     | 0.6     |
| KRT10   | 3.2                               | 3.7  | 2.6  | 3.0                               | 3.3  | 3.1  | 0.7           | 1.5   | 0.5   | 0.8     | 1.0     |
| DKK1    | 10.8                              | 9.2  | 10.0 | 10.1                              | 9.6  | 10.4 | 3.2           | 1.8   | 1.8   | 1.4     | 0.8     |
| CXCL1   | 10.5                              | 7.1  | 11.6 | 10.5                              | 7.7  | 11.0 | 10.3          | 0.5   | 21.8  | 7.1     | 0.7     |
| GJA1    | 6.8                               | 7.4  | 8.0  | 7.5                               | 7.1  | 7.5  | 0.6           | 0.4   | 1.5   | 1.3     | 1.0     |
| TNFRSF6 | 11.9                              | 11.9 | 12.1 | 12.4                              | 11.5 | 11.9 | 1.0           | 0.9   | 1.1   | 1.9     | 1.4     |
| CAMP    | 14.7                              | 13.6 | 14.0 | 14.2                              | 13.6 | 14.5 | 2.2           | 1.7   | 1.3   | 1.4     | 0.8     |
| KRT6A   | -0.2                              | 0.2  | 0.7  | 0.3                               | 0.1  | 0.3  | 0.8           | 0.5   | 1.5   | 1.2     | 1.0     |
| DEFB1   | 8.3                               | 7.9  | 8.2  | 8.4                               | 7.4  | 8.5  | 1.3           | 1.1   | 1.3   | 1.9     | 0.9     |
| KRT17   | 1.8                               | 2.4  | 2.5  | 2.2                               | 2.0  | 2.5  | 0.6           | 0.6   | 1.0   | 1.1     | 0.8     |
| IL1R1   | 13.8                              | 12.7 | 13.9 | 13.4                              | 13.6 | 13.4 | 2.2           | 0.9   | 2.4   | 0.9     | 1.0     |
| KRT14   | 0.8                               | 0.7  | 1.4  | 1.0                               | 0.9  | 1.0  | 1.1           | 0.6   | 1.6   | 1.1     | 1.0     |
| JUNB    | 7.3                               | 7.2  | 7.6  | 7.6                               | 7.0  | 7.5  | 1.0           | 0.8   | 1.3   | 1.5     | 1.1     |
| TP73L   | 5.8                               | 5.9  | 6.2  | 6.2                               | 5.8  | 6.0  | 0.9           | 0.8   | 1.2   | 1.3     | 1.1     |

Least square means of the  $\Delta$ Ct values for each diagnosis (over all stimuli) and for each stimulus (over all diagnoses) are given. Fold increase in gene expression is given as calculated by the method of Livak et al. 2001, based on the least square means. Fold increases or decreases of >4 are marked in red.
