# Supplementary material for: Genetically Programmed Differences in Epidermal Host Defense between Psoriasis and Atopic Dermatitis Patients
Source: PubMed Central journal article supplement (PMC2409155; doi:10.1371/journal.pone.0002301), 2008-06-04
Supplement: pone.0002301.s004.pdf [file pone.0002301.s004.pdf]

**Table S4. protein data of 6 genes for all cultures**

RANTES and IP-10 were determined by fluorescent bead assay

hBD-2 , SLPI and Elafin were determined by ELISA

|                  |        |           |
|------------------|--------|-----------|
| detection limits | RANTES | 2 pg/ml   |
|                  | hBD-2  | 0.5 ng/ml |
|                  | CXCL8  | 30 pg/ml  |
|                  | IP-10  | 3 pg/ml   |
|                  | Elafin | 2 ng/ml   |
|                  | SLPI   | 2 ng/ml   |

Samples that were below the detection limit were given the value of the respective detection limit

| sample | diagnosis | treatment | RANTES | hBD-2 | CXCL8 | IP-10   | Elafin | SLPI  |
|--------|-----------|-----------|--------|-------|-------|---------|--------|-------|
|        |           |           | pg/ml  | ng/ml | pg/ml | pg/ml   | ng/ml  | ng/ml |
| 1      | AD        | KGM       | 159    | 0.5   | 532   | 144     | 92     | 52    |
| 2      | AD        | KGM       | 95     | 0.5   | 30    | 444     | 444    | 172   |
| 3      | AD        | KGM       | 137    | 0.5   | 19    | 302     | 127    | 77    |
| 4      | AD        | KGM       | 60     | 0.5   | 290   | 124     | 378    | 44    |
| 5      | AD        | KGM       | 72     | 0.5   | 30    | 682     | 30     | 153   |
| 6      | AD        | KGM       | 78     | 0.5   | 92    | 258     | 111    | 60    |
| 7      | AD        | KGM       | 66     | 0.5   | 30    | 438     | 85     | 91    |
| 8      | AD        | TH1       | 10913  | 0.5   | 1303  | 751254  | 132    | 36    |
| 9      | AD        | TH1       | 3729   | 7.2   | 1983  | 1156572 | 1334   | 277   |
| 10     | AD        | TH1       | 3613   | 10.0  | 3056  | 694258  | 280    | 131   |
| 11     | AD        | TH1       | 7905   | 5.2   | 8809  | 917916  | 626    | 99    |
| 12     | AD        | TH1       | 2353   | 6.3   | 2048  | 767562  | 93     | 108   |
| 13     | AD        | TH1       | 3343   | 1.5   | 3694  | 731201  | 195    | 87    |
| 14     | AD        | TH1       | 2824   | 4.1   | 2412  | 684954  | 249    | 142   |
| 15     | AD        | TH2       | 56     | 0.5   | 748   | 132     | 92     | 61    |
| 16     | AD        | TH2       | 144    | 0.5   | 40    | 510     | 508    | 157   |
| 17     | AD        | TH2       | 412    | 0.5   | 330   | 388     | 124    | 55    |
| 18     | AD        | TH2       | 148    | 0.5   | 117   | 268     | 294    | 57    |
| 19     | AD        | TH2       | 198    | 0.5   | 30    | 627     | 232    | 91    |
| 20     | AD        | TH2       | 154    | 0.5   | 49    | 250     | 30     | 35    |
| 21     | AD        | TH2       | 147    | 0.5   | 13    | 326     | 88     | 68    |
| 22     | NS        | KGM       | 23     | 0.5   | 30    | 94      | 147    | 192   |
| 23     | NS        | KGM       | 11     | 0.5   | 30    | 241     | 97     | 112   |
| 24     | NS        | KGM       | 29     | 0.5   | 30    | 139     | 416    | 274   |
| 25     | NS        | KGM       | 26     | 0.5   | 30    | 154     | 228    | 237   |
| 26     | NS        | KGM       | 103    | 0.5   | 30    | 333     | 249    | 274   |
| 27     | NS        | KGM       | 28     | 0.5   | 947   | 1465    | 182    | 44    |
| 28     | NS        | KGM       | 35     | 0.5   | 30    | 1021    | 98     | 42    |
| 29     | NS        | TH1       | 1910   | 6.5   | 1730  | 741868  | 565    | 321   |
| 30     | NS        | TH1       | 6434   | 9.5   | 5336  | 827551  | 704    | 166   |
| 31     | NS        | TH1       | 5738   | 17.3  | 3525  | 901105  | 1313   | 479   |
| 32     | NS        | TH1       | 2158   | 5.0   | 4528  | 1100709 | 1413   | 509   |
| 33     | NS        | TH1       | 6796   | 9.9   | 4607  | 685593  | 1252   | 378   |
| 34     | NS        | TH1       | 6888   | 5.3   | 28152 | 819416  | 490    | 62    |
| 35     | NS        | TH1       | 15115  | 8.7   | 15949 | 716616  | 391    | 100   |
| 36     | NS        | TH2       | 55     | 0.5   | 30    | 183     | 135    | 143   |
| 37     | NS        | TH2       | 24     | 0.5   | 30    | 186     | 85     | 92    |
| 38     | NS        | TH2       | 85     | 0.5   | 33    | 284     | 457    | 270   |
| 39     | NS        | TH2       | 50     | 0.5   | 30    | 213     | 302    | 161   |
| 40     | NS        | TH2       | 78     | 0.5   | 30    | 102     | 395    | 234   |
| 41     | NS        | TH2       | 37     | 0.5   | 348   | 2121    | 112    | 29    |
| 42     | NS        | TH2       | 50     | 0.5   | 35    | 1502    | 93     | 29    |
| 43     | PS        | KGM       | 53     | 0.5   | 114   | 446     | 400    | 181   |
| 44     | PS        | KGM       | 87     | 0.5   | 179   | 651     | 397    | 146   |
| 45     | PS        | KGM       | 86     | 0.5   | 34    | 369     | 644    | 219   |
| 46     | PS        | KGM       | 32     | 0.5   | 73    | 145     | 124    | 80    |
| 47     | PS        | KGM       | 123    | 0.5   | 106   | 600     | 157    | 116   |
| 48     | PS        | KGM       | 158    | 0.5   | 545   | 144     | 200    | 43    |
| 49     | PS        | KGM       | 200    | 0.5   | 2410  | 512     | 202    | 115   |
| 50     | PS        | TH1       | 6888   | 10.8  | 6283  | 1480338 | 1376   | 290   |
| 51     | PS        | TH1       | 3968   | 13.4  | 3321  | 668409  | 950    | 306   |
| 52     | PS        | TH1       | 3065   | 8.0   | 991   | 892776  | 2065   | 291   |
| 53     | PS        | TH1       | 8144   | 7.4   | 14176 | 977495  | 597    | 178   |
| 54     | PS        | TH1       | 13152  | 11.4  | 4505  | 1186730 | 347    | 205   |
| 55     | PS        | TH1       | 13942  | 8.2   | 6798  | 735671  | 294    | 64    |
| 56     | PS        | TH1       | 15358  | 22.6  | 87777 | 901555  | 795    | 242   |
| 57     | PS        | TH2       | 102    | 0.5   | 122   | 183     | 431    | 163   |
| 58     | PS        | TH2       | 126    | 0.5   | 170   | 219     | 446    | 103   |
| 59     | PS        | TH2       | 215    | 0.5   | 30    | 362     | 458    | 164   |
| 60     | PS        | TH2       | 51     | 0.5   | 87    | 265     | 114    | 65    |
| 61     | PS        | TH2       | 222    | 0.5   | 123   | 942     | 149    | 83    |
| 62     | PS        | TH2       | 171    | 0.5   | 319   | 650     | 206    | 51    |
| 63     | PS        | TH2       | 332    | 0.5   | 2404  | 618     | 188    | 95    |
