# Supplementary material for: Genetically Programmed Differences in Epidermal Host Defense between Psoriasis and Atopic Dermatitis Patients
Source: PubMed Central journal article supplement (PMC2409155; doi:10.1371/journal.pone.0002301), 2008-06-04
Supplement: pone.0002301.s005.pdf [file pone.0002301.s005.pdf]

**Table S5. p-values of post-hoc test on protein data**

| Protein | p-value   |          | p-values PS vs NS |        |        | p-values AD vs NS |        |        | p-values PS vs AD |        |        | p-values all diagnoses |            |            |
|---------|-----------|----------|-------------------|--------|--------|-------------------|--------|--------|-------------------|--------|--------|------------------------|------------|------------|
|         | Diagnosis | Stimulus | Cross effect      | KGM    | Th1    | Th2               | KGM    | Th1    | Th2               | KGM    | Th1    | Th2                    | Th1 vs KGM | Th2 vs KGM |
|         |           |          |                   |        |        |                   |        |        |                   |        |        |                        |            |            |
| CXCL8   | 0.0235    | 0.0000   | 0.5142            | 0.0736 | 0.8351 | 0.0616            | 0.6063 | 0.2326 | 0.4063            | 0.1732 | 0.1874 | 0.2359                 | 0.0001     | 0.9939     |
| hBD-2   | 0.0110    | 0.0000   | 0.0019            | 1.0000 | 0.1883 | 1.0000            | 1.0000 | 0.0004 | 1.0000            | 1.0000 | 0.0001 | 1.0000                 | 0.0001     | 1.0000     |
| elafin  | 0.0046    | 0.0000   | 0.6778            | 0.3963 | 0.9118 | 0.4262            | 0.4147 | 0.0155 | 0.5333            | 0.1160 | 0.0155 | 0.1865                 | 0.0001     | 0.9380     |
| RANTES  | 0.0000    | 0.0000   | 0.0281            | 0.0014 | 0.1984 | 0.0019            | 0.0012 | 0.5214 | 0.0016            | 0.9724 | 0.0701 | 0.9202                 | 0.0001     | 0.0052     |
| SLPI    | 0.0240    | 0.0051   | 0.9531            | 0.6901 | 0.7666 | 0.8583            | 0.2466 | 0.0635 | 0.2998            | 0.4082 | 0.1034 | 0.3634                 | 0.0269     | 0.2921     |
| IP-10   | 0.6505    | 0.0000   | 0.9999            | 0.7069 | 0.6840 | 0.7701            | 0.9161 | 0.9551 | 0.8040            | 0.6464 | 0.6646 | 0.6138                 | 0.0001     | 0.5766     |

Analysis of ELISA and fluorescent bead assays for six secreted proteins of 63 cultures. For raw data see Table S4. Protein data largely corresponded to qPCR data, showing a strong effect of Th1 cytokines on gene expression. The factor diagnosis was significant for most proteins. The p-values of diagnosis, stimulus and cross effect were obtained by factorial ANOVA on log transformed data. Significances of the subgroup comparisons were obtained by post-hoc testing (Duncan's multiple range test). p-values smaller than 0.05 are indicated in red.
